# Supplementary material for: Noncovalent dispersion of multi-walled carbon nanotubes with poly(tert-butyl methacrylate) modified hyperbranched polyethylene for flexible conductive films
Source: Royal Society of Chemistry journal article supplement (doi:10.1039/c6ra14757g), 2016-01-01
Supplement: c6ra14757g1.pdf [file c6ra14757g1.pdf]

## Supporting Information

### Noncovalent dispersion of multi-walled carbon nanotubes with poly(*tert*-butyl methacrylate) modified hyperbranched polyethylene for flexible conductive film

Zheng Deng, Li Wang\*, Haojie Yu\*, Xiaoting Zhai, Yongsheng Chen

#### 1. Chemicals and methods

##### 1.1 Chemicals

HBPE-*g*-PtBMA ( $M_n=145.1$  kg/mol, PDI=2.8) was synthesized according to the literature <sup>1</sup>. The FT-IR spectrum of HBPE-*g*-PtBMA was shown in Fig. S1a, and ascribed as follow <sup>1</sup>: 2978, 2927, 2855  $\text{cm}^{-1}$  ( $\nu_{\text{C-H}}$ ,  $-\text{CH}_2-$ ,  $-\text{CH}_3$ ), 1725  $\text{cm}^{-1}$  ( $\tau_{\text{C=O}}$ ,  $-\text{C=O-R}$ ), 1461  $\text{cm}^{-1}$  ( $\delta_{\text{C-H}}$ ,  $-\text{CH}_2-$ ,  $-\text{CH}_3$ ), 1393, 1368  $\text{cm}^{-1}$  ( $\delta_{(\text{S, C-H})}$ ,  $-\text{CH}_3$ ), 1252  $\text{cm}^{-1}$  ( $\nu_{\text{C-O}}$ ,  $-(\text{C=O})-\text{O}$ ) and 1139  $\text{cm}^{-1}$  ( $\nu_{\text{C-O}}$ ,  $\text{R-C-O-}$ ). Multi-walled carbon nanotubes (MWCNTs) (diameter=6-9 nm, length=5  $\mu\text{m}$ , purity >95% carbon) and glass wool (98%) were purchased from Sigma Aldrich. The Raman spectrum of MWCNTs was shown in Fig. S1b, and ascribed as follow <sup>2</sup>: 1341  $\text{cm}^{-1}$  (D band) and 1580  $\text{cm}^{-1}$  (G band). Chloroform ( $\text{CHCl}_3$ , AR) was purchased from Sinopharm Chemical Reagent Co., Ltd.

##### 1.2 Dispersion of MWCNTs by HBPE-*g*-PtBMA in $\text{CHCl}_3$

MWCNTs (4.0 mg) were dispersed employing a certain amount of HBPE-*g*-PtBMA in 4.0 mL  $\text{CHCl}_3$  by ultrasonication at 35 °C for 1.0 h <sup>3, 4</sup>. The MWCNTs dispersion was then left undisturbed for 24 h. To remove the bundled MWCNTs, the supernatant of MWCNTs/HBPE-*g*-PtBMA dispersion was filtrated through glass wool (0.1 g) packed in a 5.0 mL syringe <sup>5</sup>. The obtained stable MWCNTs dispersion was utilized for lateral analysis. Typically, for TGA measurement, 0.8 mL of the stable MWCNTs/HBPE-*g*-PtBMA dispersion was transferred into a TGA sample pan in batches. After evaporating most of the  $\text{CHCl}_3$  in the TGA pan at room temperature, the resultant mixture together with the pan were dried under vacuum at 35 °C for 24 h. Finally, the dried MWCNTs/HBPE-*g*-PtBMA was subjected to TGA measurements directly. For TEM and SEM analysis, 20.0  $\mu\text{L}$  of the MWCNTs dispersion was dropped onto the copper grid and silica wafer respectively after proper dilution.

##### 1.3 Preparation of HBPE-*g*-PtBMA/MWCNTs/PET conductive film

The conductive film was prepared by spin-coating (200 RPM, 120 s) the stable MWCNTs/HBPE-*g*-PtBMA dispersion (50  $\mu$ L, 455 mg/mL, HBPE-*g*-PtBMA/MWCNTs=2/1, wt/wt) onto the PET substrate. The resultant film was dried at room temperature for 24 h. Then, two pieces of copper foils were pasted at the edge of the film for electronic properties study.

#### 1.4 Measurements

Fourier transform infrared spectrum (FT-IR) was recorded on Nicolet 5700. Raman spectrum was recorded on LabRAM HR Evolution (Horiba) with a laser power of 150 mW through a 50 $\times$  objective. Thermo gravimetric analysis (TGA) was performed on TA-Q500 (Mettler-Toledo) at a heating rate of 10  $^{\circ}$ C/min in nitrogen atmosphere. UV-vis spectra were recorded on UNICO UV-3802. Scanning electron microscope (SEM) images were taken using Hitachi SU-8010 SEM. Transmission electron microscopy (TEM) images were taken using Hitachi HT-7700 TEM. The thickness of the conductive film were measured by using TT240 eddy current thickness meter from ten different places. The conductivity of the prepared film was measured in SB1002A/2 four-probe conductivity meter based on equation (S1) obtained from the operation manual.

$$\rho_F = \frac{\pi}{\ln 2} \times \frac{V}{I} \times d$$

Equation (S1).  $\rho_F$ : the specific resistance;  $I$ : the current applied in the four-probe conductivity meter;  $V$ : the voltage measured in the four-probe conductivity meter;  $d$ : the thickness of the conductive film and  $\pi$ : constant (3.14).

#### 2. Calculating the concentration of HBPE-*g*-PtBMA/MWCNTs dispersion

Firstly, the pristine MWCNTs, HBPE-*g*-PtBMA, and HBPE-*g*-PtBMA/MWCNTs dispersion with a mass ratio of HBPE-*g*-PtBMA/MWCNTs=2.0 were analyzed by TGA independently. As shown in Fig. S2a, pristine MWCNTs almost showed negligible mass lose even at 600  $^{\circ}$ C. In contrast, HBPE-*g*-PtBMA and HBPE-*g*-PtBMA/MWCNTs dispersion showed three stages of weight lose at about 150  $^{\circ}$ C, 250  $^{\circ}$ C and 400  $^{\circ}$ C respectively. It was noted that the TGA curves of four individually prepared TGA samples of HBPE-*g*-PtBMA/MWCNTs dispersion with the same mass ratio of HBPE-*g*-PtBMA/MWCNTs almost overlapped before 500  $^{\circ}$ C. However, they showed different mass residues after 500  $^{\circ}$ C, which

might because of the system error. Then, the average concentration of MWCNTs in  $\text{CHCl}_3$  was calculated to be 455 mg/L based on the TGA data at 600 °C according to the equation (S2).

$$\begin{cases} m_3 = m_1 + m_2 \\ m_3' = a \times m_1 + b \times m_2 \end{cases} \Rightarrow m_1 = \frac{m_3' - b \times m_3}{a - b} \quad m_2 = \frac{a \times m_3 - m_3'}{a - b}$$

Equation (S2). Equation employed to calculate the exact mass of MWCNTs in the dispersion based on the TGA data.  $m_1$ : the unknown initial weight of MWCNTs;  $m_2$ : the unknown initial weight of HBPE-*g*-PtBMA;  $m_3$ : the initial weight of HBPE-*g*-PtBMA/MWCNTs mixture determined by TGA;  $m_3'$ : the final weight of HBPE-*g*-PtBMA/MWCNTs mixture at 600 °C determined by TGA;  $a$ : the weight percentage of MWCNTs at 600 °C determined by TGA;  $b$ : the weight percentage of HBPE-*g*-PtBMA at 600 °C determined by TGA.

Secondly, the HBPE-*g*-PtBMA/MWCNTs dispersion with known concentration (455 mg/L) was subsequently diluted to six samples with concentration varied from 1 to 10  $\mu\text{g/mL}$  and their UV-vis spectra were recorded (Fig. S2b). Then, their absorbance at 600 nm were plotted against their corresponding concentration. The specific extinction coefficient of MWCNTs in  $\text{CHCl}_3$  was then calculated to be  $0.0648 \text{ L}\cdot\text{cm}^{-1}\cdot\text{mg}^{-1}$  after linear fitting (Fig. S2c). The UV-vis spectra of HBPE-*g*-PtBMA/MWCNTs dispersion with mass ratio of HBPE-*g*-PtBMA/MWCNTs varied from 0 to 5.0 were recorded after proper dilution (Fig. S2d) and their concentration were then calculated based on their absorbance at 600 nm and the specific extinction coefficient obtained above.

### 3. Figures

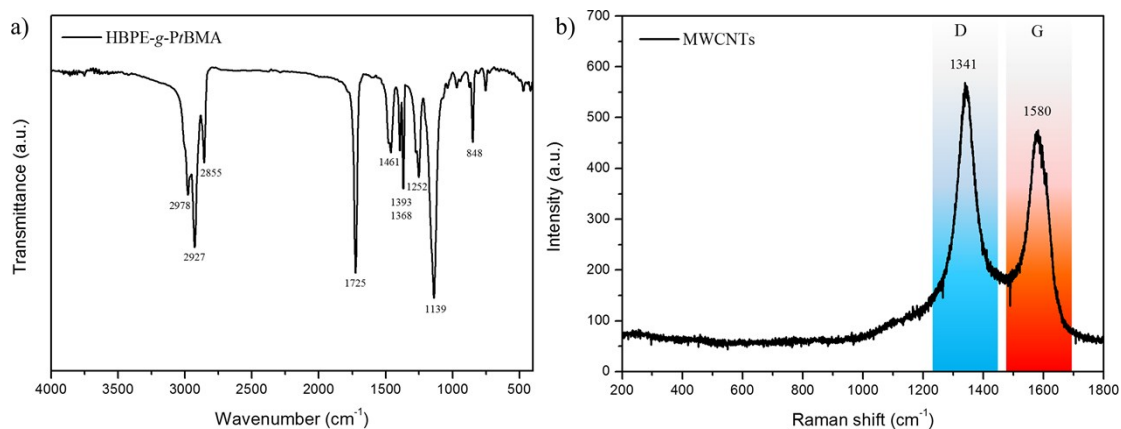

Fig. S1 a) FT-IR spectrum of HBPE-*g*-PtBMA and b) Raman spectrum of pristine MWCNTs.

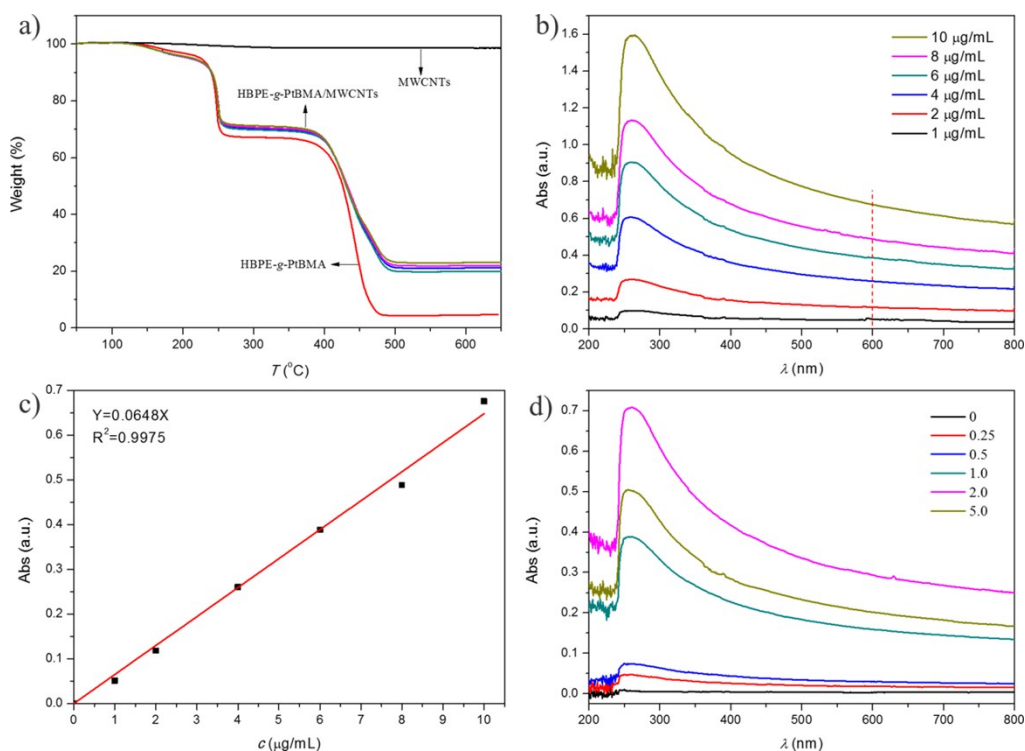

Fig. S2. a) TGA curves of HBPE-g-PtBMA, pristine MWCNTs and four individually prepared HBPE-g-PtBMA/MWCNTs dispersion with the same mass ratio of HBPE-g-PtBMA/MWCNTs=2.0. b) UV-vis spectra of HBPE-g-PtBMA/MWCNTs dispersion (HBPE-g-PtBMA/MWCNTs=2:1 wt/wt) with concentration of MWCNTs varied from 1 to 10  $\mu\text{g/mL}$ ; c) Linear fitting curve of the absorbance of MWCNTs in  $\text{CHCl}_3$  at 600 nm against their concentration and d) UV-vis spectra of HBPE-g-PtBMA/MWCNTs dispersion with mass ratio of HBPE-g-PtBMA/MWCNTs varied from 0 to 5.0.

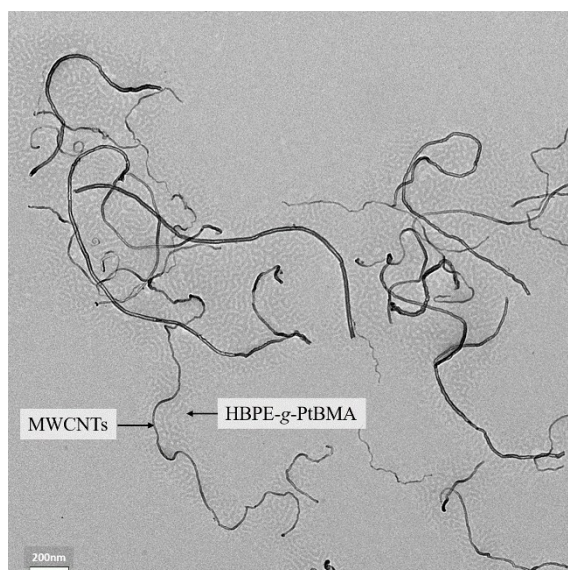

Fig. S3. Magnified TEM image of HBPE-g-PtBMA/MWCNTs dispersion with mass ratio of HBPE-g-PtBMA/MWCNTs=2.0.

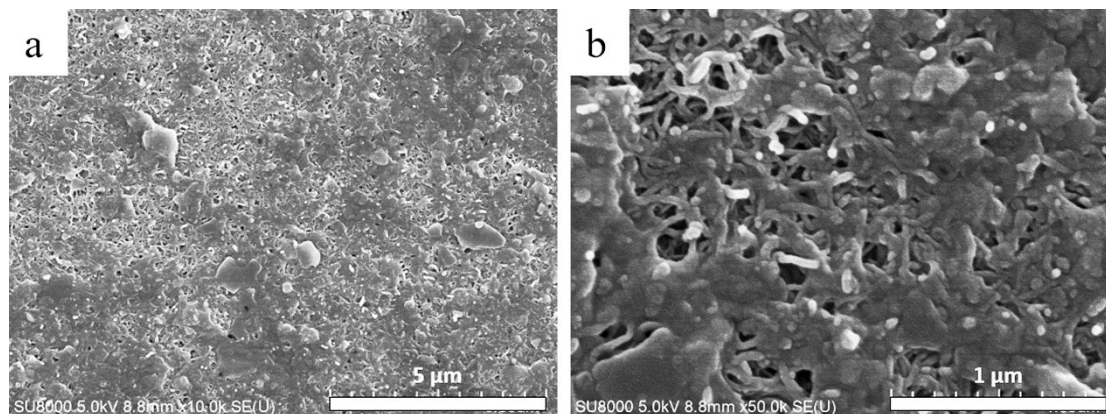

Fig. S4. SEM a) and magnified SEM b) image of the conductive film.

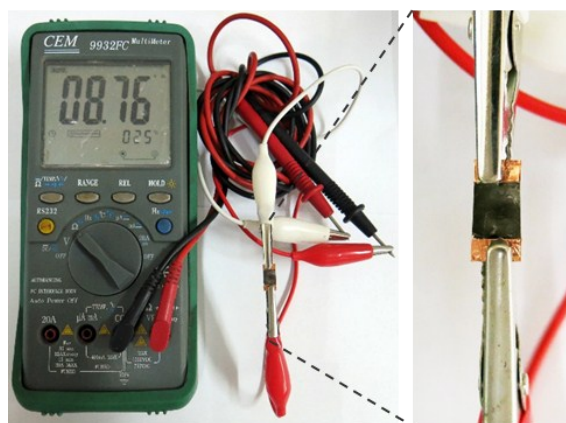

Fig. S5. Photo of the universal resistance meter used to study the flexible properties of conductive film.

#### 4. Reference

1. Z. Deng, L. Wang, H. Yu, X. Zhai and Y. Chen, *RSC Adv.*, 2016, 6, 27682-27689.
2. S. Botti, S. Laurenzi, L. Mezi, A. Rufoloni and M. G. Santonicola, *Phys. Chem. Chem. Phys.*, 2015, 17, 21373-21380.
3. Z. Deng, H. Yu, L. Wang and X. Zhai, *J. Organomet. Chem.*, 2015, 791, 274-278.
4. E. Pavoni, E. Bandini, M. Benaglia, J. K. Molloy, G. Bergamini, P. Ceroni and N. Armaroli, *Polym. Chem.*, 2014, 5, 6148-6150.
5. X. W. Mao, G. C. Rutledge and T. A. Hatton, *Langmuir*, 2013, 29, 9626-9634.
